# Supplementary material
Source: ML conference proceedings conference paper supplement (https://proceedings.neurips.cc/paper_files/paper/2018/hash/56a3107cad6611c8337ee36d178ca129-Abstract.html)
Supplement: Supplementary file [file 56a3107cad6611c8337ee36d178ca129-Supplemental.zip]

---

# Supplementary Material for Legendre Decomposition for Tensors

---

**Mahito Sugiyama**  
National Institute of Informatics  
JST, PRESTO  
mahito@nii.ac.jp

**Hiroyuki Nakahara**  
RIKEN Center for Brain Science  
hiro@brain.riken.jp

**Koji Tsuda**  
The University of Tokyo  
NIMS; RIKEN AIP  
tsuda@k.u-tokyo.ac.jp

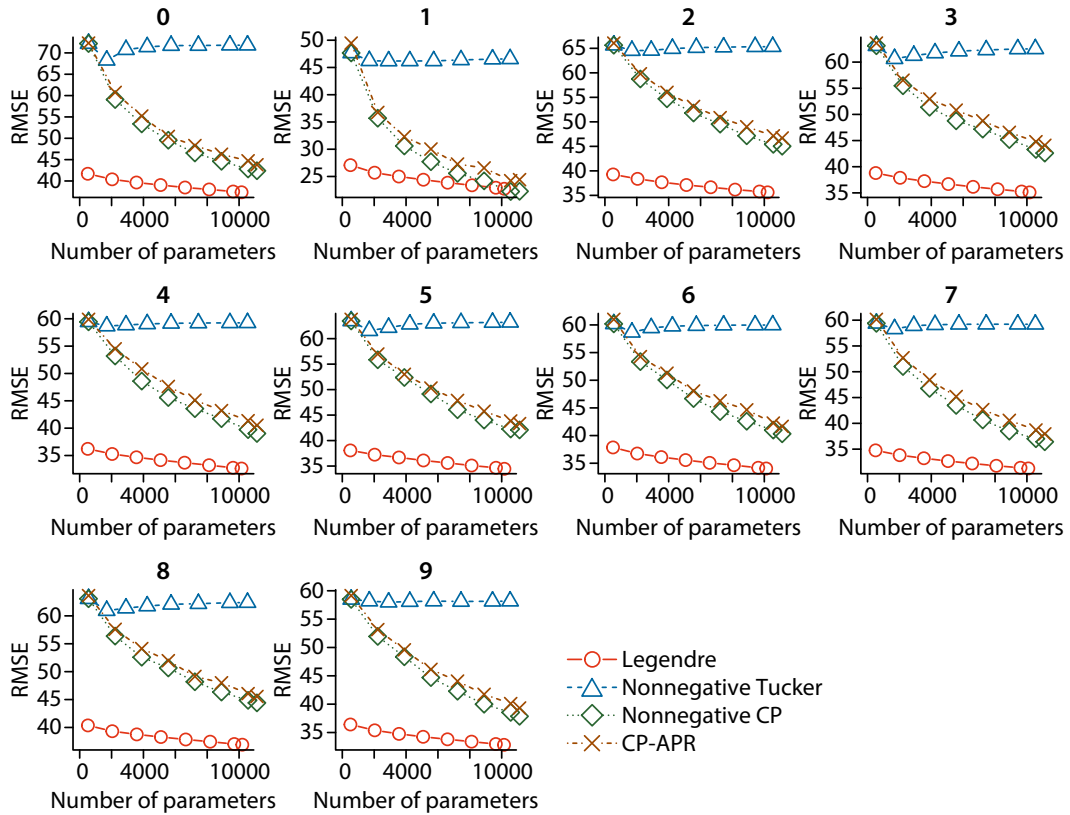

Figure S1: Experimental results on each digit from 0 to 9 in MNIST. Legendre decomposition is shown in red circles, nonnegative Tucker decomposition in blue triangles, nonnegative CP decomposition in green diamonds, and CP-APR in brown crosses.
